# Supplementary material for: Evaluation of Pharmacokinetic Feasibility of Febuxostat/L-pyroglutamic Acid Cocrystals in Rats and Mice
Source: MDPI journal article supplement (doi:10.3390/pharmaceutics15082167), 2023-08-21
Supplement: s1 [file s1]

# Supplementary material

(a)

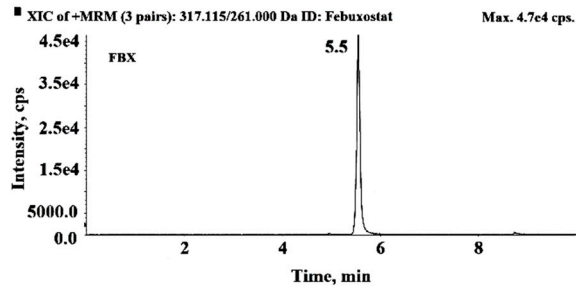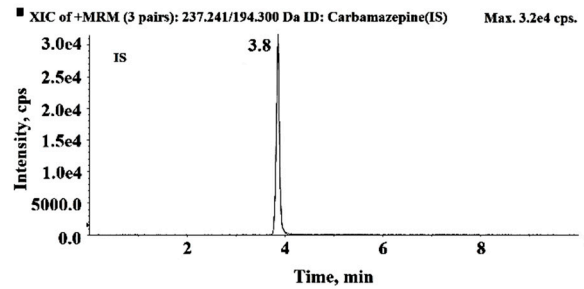

(b)

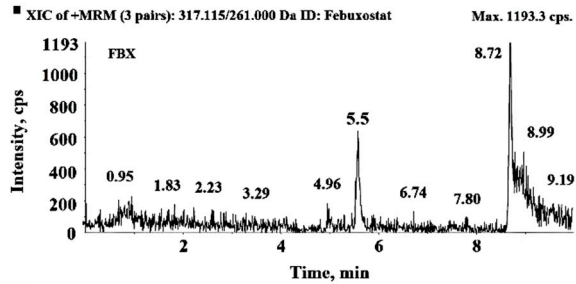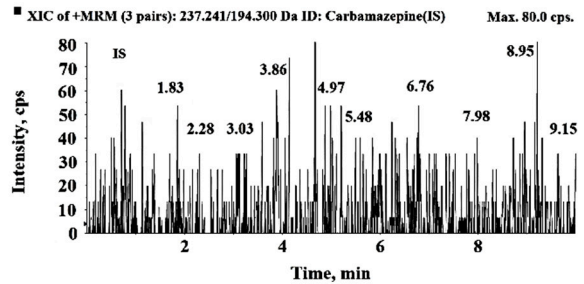

(c)

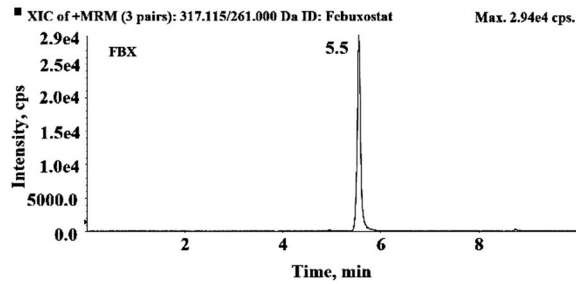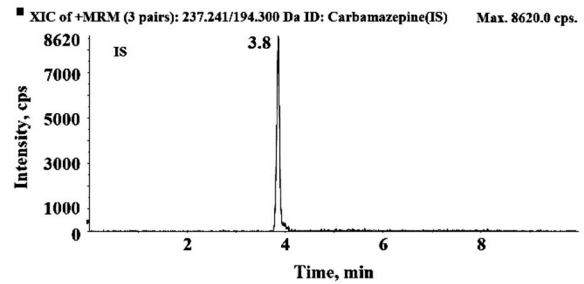

(d)

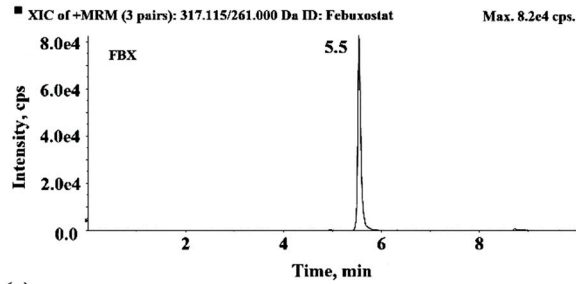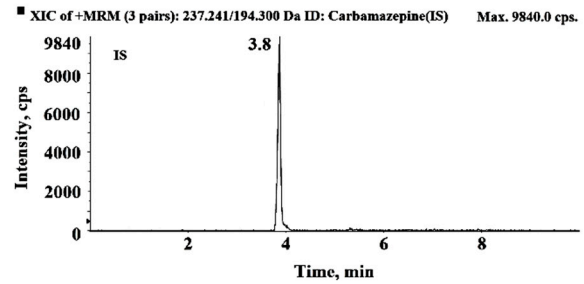

(e)

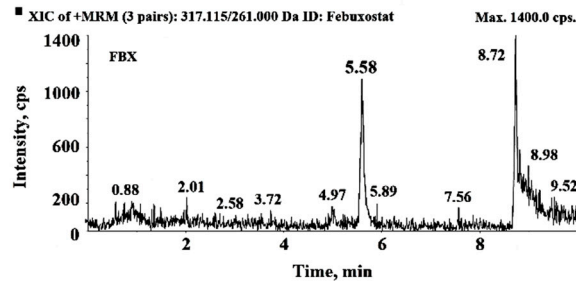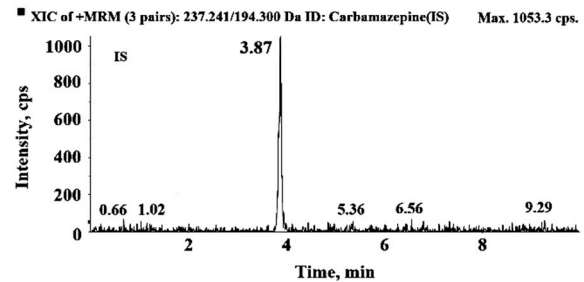

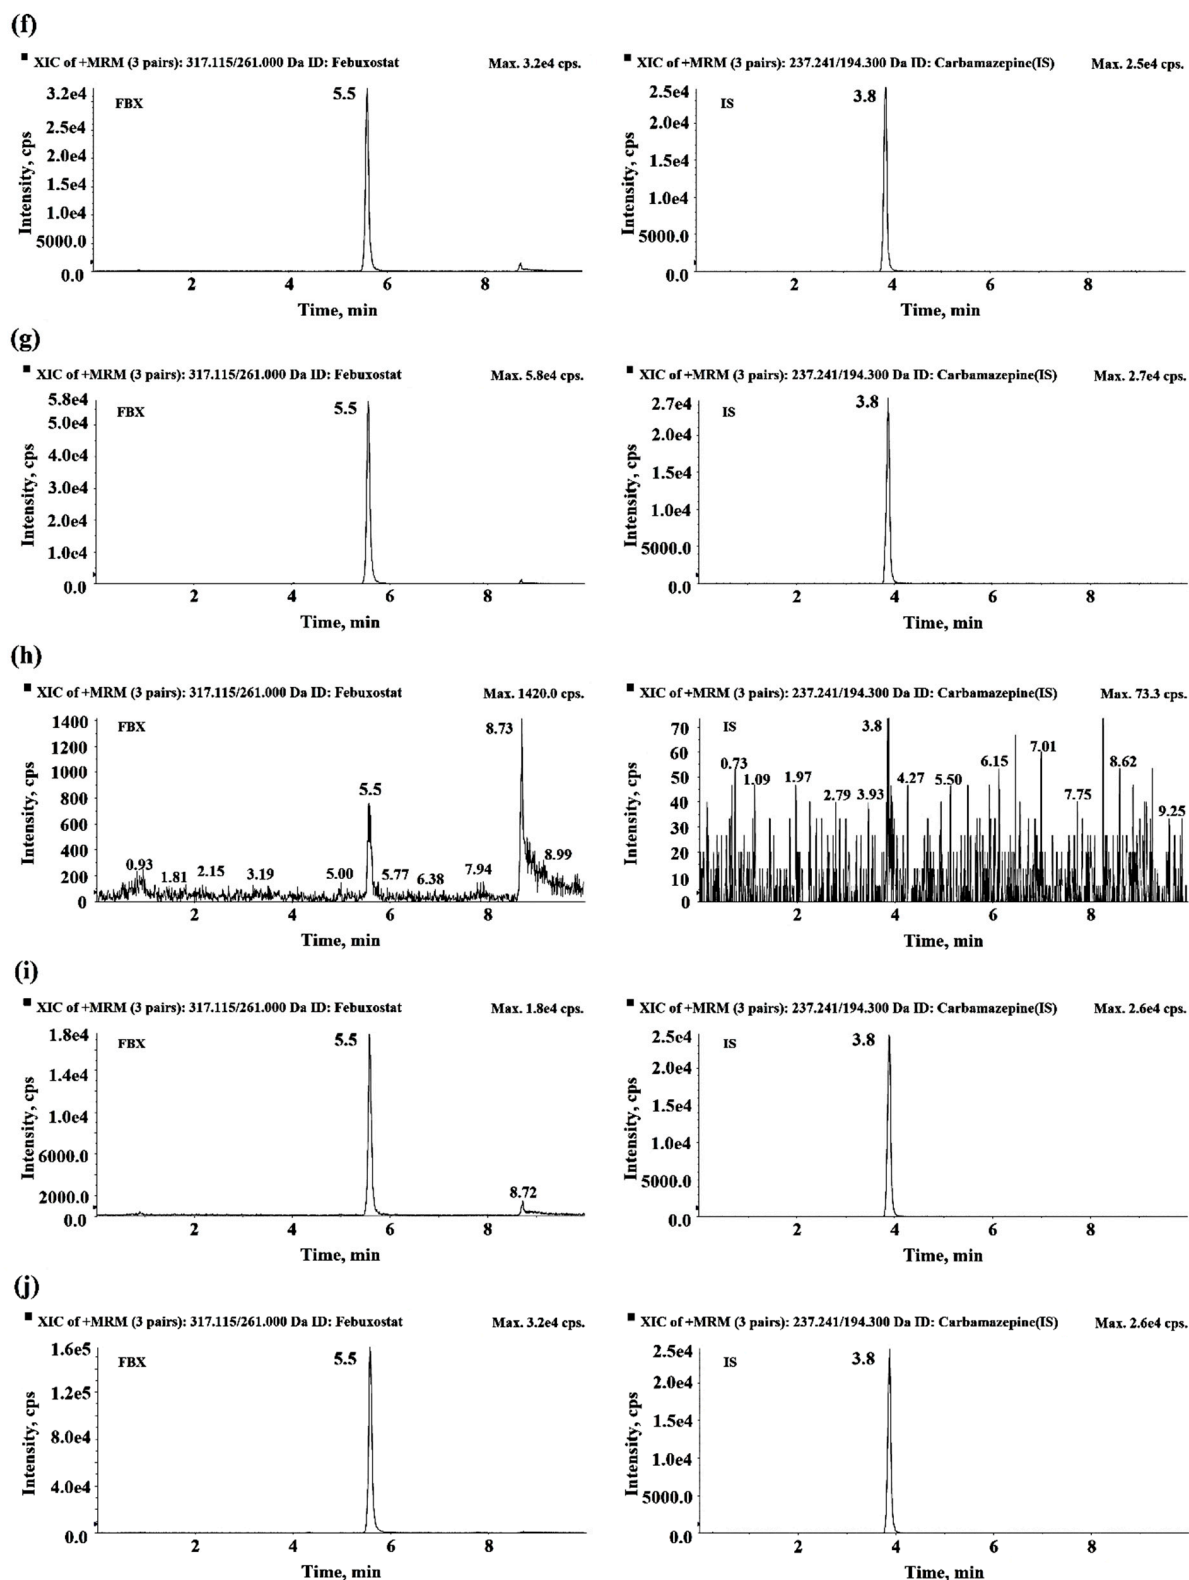

**Figure S1.** Representative chromatograms of FBX and IS in mouse plasma, urine, and GI samples. **(a)** Stock solution of 0.005  $\mu\text{g/mL}$  FBX and 0.005  $\mu\text{g/mL}$  IS; **(b)** drug-free mouse plasma; **(c)** plasma standard spiked with 7  $\mu\text{g/mL}$  FBX; **(d)** plasma sample at 30 min after oral administration of 50 mg/kg FBX; **(e)** drug-free urine; **(f)** urine standard spiked with 7  $\mu\text{g/mL}$  FBX; **(g)** urine sample collected at 24 h after oral administration of 50 mg/kg FBX; **(h)** drug-free GI; **(i)** GI standard spiked with 7  $\mu\text{g/mL}$  FBX; **(j)** GI sample collected at 24 h after oral administration of 50 mg/kg FBX.

**Table S1.** Concentrations ( $\mu\text{g/mL}$  for plasma and  $\mu\text{g/g}$  tissue in tissues) of FBX in plasma and tissues and their T/P ratios after oral (50 mg/kg as FBX) administration of FBX or FBX-PG to mice, respectively. Values in parentheses are mean values of the T/P ratios.

| Tissue          | FBX ( <i>n</i> = 6)                     |                                         |                                        |                                        |                                         |
|-----------------|-----------------------------------------|-----------------------------------------|----------------------------------------|----------------------------------------|-----------------------------------------|
|                 | 0.5 h                                   | 2 h                                     | 4 h                                    | 8 h                                    | 12 h                                    |
| Plasma          | 22.4 $\pm$ 6.49                         | 22.6 $\pm$ 7.76                         | 11.8 $\pm$ 8.00                        | 4.91 $\pm$ 1.28                        | 11.4 $\pm$ 6.95                         |
| Liver           | 32.4 $\pm$ 4.76<br>(1.53 $\pm$ 0.395)   | 37.7 $\pm$ 8.24<br>(1.75 $\pm$ 0.431)   | 23.7 $\pm$ 10.1<br>(2.43 $\pm$ 0.758)  | 21.3 $\pm$ 11.9<br>(4.13 $\pm$ 1.32)   | 26.3 $\pm$ 15.1<br>(2.40 $\pm$ 0.286)   |
| Kidney          | 11.1 $\pm$ 3.85<br>(0.512 $\pm$ 0.168)  | 11.3 $\pm$ 7.18<br>(0.523 $\pm$ 0.363)  | 12.1 $\pm$ 9.80<br>(0.952 $\pm$ 0.450) | 8.64 $\pm$ 3.34<br>(1.89 $\pm$ 1.00)   | 8.00 $\pm$ 5.43<br>(0.662 $\pm$ 0.160)  |
| Stomach         | 112 $\pm$ 52.8<br>(5.55 $\pm$ 2.97)     | 189 $\pm$ 59.8<br>(8.93 $\pm$ 3.40)     | 125 $\pm$ 56.8<br>(13.8 $\pm$ 6.74)    | 75.4 $\pm$ 29.7<br>(16.4 $\pm$ 7.91)   | 87.9 $\pm$ 55.0<br>(13.6 $\pm$ 13.8)    |
| Small intestine | 23.2 $\pm$ 16.8<br>(1.05 $\pm$ 0.616)   | 26.6 $\pm$ 22.8<br>(1.32 $\pm$ 1.09)    | 33.0 $\pm$ 29.8<br>(2.92 $\pm$ 1.55)   | 19.6 $\pm$ 7.49<br>(4.45 $\pm$ 2.68)   | 18.0 $\pm$ 7.31<br>(2.19 $\pm$ 2.04)    |
| Large intestine | 17.8 $\pm$ 20.8<br>(1.00 $\pm$ 1.51)    | 10.5 $\pm$ 8.05<br>(0.562 $\pm$ 0.528)  | 20.4 $\pm$ 19.5<br>(1.52 $\pm$ 0.900)  | 10.0 $\pm$ 5.72<br>(2.10 $\pm$ 1.23)   | 7.09 $\pm$ 3.72<br>(0.769 $\pm$ 0.419)  |
| Lung            | 35.0 $\pm$ 52.0<br>(1.80 $\pm$ 2.69)    | 34.2 $\pm$ 16.9<br>(1.70 $\pm$ 0.960)   | 27.5 $\pm$ 22.2<br>(2.04 $\pm$ 1.03)   | 136 $\pm$ 48.4<br>(27.6 $\pm$ 5.82)    | 58.1 $\pm$ 34.3<br>(4.23 $\pm$ 1.99)    |
| Heart           | 3.42 $\pm$ 2.51<br>(0.157 $\pm$ 0.112)  | 2.97 $\pm$ 1.48<br>(0.116 $\pm$ 0.0422) | 3.12 $\pm$ 1.48<br>(0.328 $\pm$ 0.133) | 3.03 $\pm$ 3.28<br>(0.563 $\pm$ 0.461) | 2.04 $\pm$ 0.558<br>(0.247 $\pm$ 0.177) |
| Fat             | 4.19 $\pm$ 1.81<br>(0.190 $\pm$ 0.0649) | 4.57 $\pm$ 2.41<br>(0.228 $\pm$ 0.0934) | 4.54 $\pm$ 2.34<br>(0.586 $\pm$ 0.485) | 8.30 $\pm$ 8.06<br>(1.82 $\pm$ 1.99)   | 2.17 $\pm$ 1.51<br>(0.315 $\pm$ 0.410)  |

| Tissue          | FBX-PG ( <i>n</i> = 3) |                  |                  |                 |                   |
|-----------------|------------------------|------------------|------------------|-----------------|-------------------|
|                 | 0.5 h                  | 2 h              | 4 h              | 8 h             | 12 h              |
| Plasma          | 19.5 ± 4.96            | 36.1 ± 18.0      | 13.5 ± 4.33      | 6.55 ± 1.88     | 29.6 ± 13.5*      |
| Liver           | 64.2 ± 26.7*           | 102 ± 22.8*      | 146 ± 83.4*      | 52.4 ± 5.07*    | 30.1 ± 6.06       |
|                 | (3.33 ± 1.10)*         | (3.31 ± 1.42)    | (10.1 ± 6.52)*   | (8.38 ± 2.00)*  | (1.17 ± 0.507)*   |
| Kidney          | 22.0 ± 8.32*           | 14.7 ± 8.09      | 10.3 ± 1.48      | 13.9 ± 6.55     | 11.8 ± 4.09       |
|                 | (1.11 ± 0.220)*        | (0.396 ± 0.0366) | (0.845 ± 0.421)  | (2.03 ± 0.558)  | (0.477 ± 0.264)   |
| Stomach         | 159 ± 48.3             | 126 ± 40.1       | 234 ± 86.7       | 197 ± 156       | 74.1 ± 30.3       |
|                 | (9.05 ± 5.52)          | (4.36 ± 2.82)    | (17.2 ± 1.05)    | (26.5 ± 19.8)   | (3.02 ± 2.08)     |
| Small intestine | 21.1 ± 3.72            | 32.9 ± 18.3      | 21.0 ± 2.44      | 20.9 ± 1.31     | 13.8 ± 5.30       |
|                 | (1.10 ± 0.117)         | (0.989 ± 0.385)  | (1.65 ± 0.442)   | (3.43 ± 1.29)   | (0.530 ± 0.270)   |
| Large intestine | 17.3 ± 7.20            | 28.5 ± 24.2      | 49.7 ± 15.9      | 21.7 ± 19.6     | 16.1 ± 9.72       |
|                 | (0.970 ± 0.564)        | (1.40 ± 1.88)    | (4.25 ± 2.86)    | (3.00 ± 2.20)   | (0.513 ± 0.186)   |
| Lung            | 311 ± 209*             | 121 ± 55.6*      | 144 ± 75.9*      | 178 ± 63.5      | 121 ± 85.3        |
|                 | (15.8 ± 8.37)*         | (3.85 ± 1.78)    | (10.4 ± 4.38)*   | (27.0 ± 3.81)   | (4.14 ± 2.23)     |
| Heart           | 2.24 ± 0.511           | 3.95 ± 2.01      | 2.45 ± 0.978     | 2.45 ± 2.47     | 1.71 ± 1.09       |
|                 | (0.118 ± 0.0270)       | (0.111 ± 0.0134) | (0.180 ± 0.0229) | (0.350 ± 0.282) | (0.0589 ± 0.0276) |
| Fat             | 3.23 ± 0.964           | 4.30 ± 1.29      | 3.81 ± 1.11      | 6.10 ± 4.48     | 1.58 ± 0.489      |
|                 | (0.167 ± 0.0340)       | (0.174 ± 0.167)  | (0.286 ± 0.0328) | (0.988 ± 0.680) | (0.0599 ± 0.227)  |

\* Statistically different (*P*-value < 0.05) from FBX mice.
